# Supplementary material for: Au Nanoparticles Decorated Graphene-Based Hybrid Nanocomposite for As(III) Electroanalytical Detection
Source: MDPI journal article supplement (doi:10.3390/chemosensors10020067), 2022-02-08
Supplement: s1 [file s1]

# Au Nanoparticles Decorated Graphene based Hybrid Nanocomposite for As(III) Electroanalytical Detection

V. Pifferi<sup>1\*</sup>, A. Testolin<sup>1</sup>, C. Ingrosso<sup>2\*</sup>, M. L. Curri<sup>2,3</sup>, I. Palchetti<sup>4</sup>, L. Falciola<sup>1</sup>

<sup>1</sup>Dept. of Chemistry, Università degli Studi di Milano, via Golgi 19, 20133, Milano, Italy.

<sup>2</sup>CNR-IPCF Sez. Bari, c/o Dept. of Chemistry, Università degli Studi di Bari, via Orabona 4, I-70126 Bari, Italy.

<sup>3</sup>Dept. of Chemistry, Università degli Studi di Bari, via Orabona 4, I-70126 Bari, Italy.

<sup>4</sup>Dept. of Chemistry Ugo Schiff, Università degli Studi di Firenze, via della Lastruccia 3-13, 50019 Sesto Fiorentino (Fi), Italy.

\*corresponding authors: valentina.pifferi@unimi.it, c.ingrosso@ba.ipcf.cnr.it

**Table S1:** Examples of LODs and dynamic ranges of some nanocomposite-modified electrodes for As(III) determination.

| Modified electrode                           | LOD (ppb) | Dynamic range (ppb) | Ref       |
|----------------------------------------------|-----------|---------------------|-----------|
| GO-(GO-Co (DIP)) decorated GCE               | 3         | --                  | [1]       |
| AuNPs/rGO decorated CPE                      | 0,13      | 1-20                | [2]       |
| TiO <sub>2</sub> NPs decorated Au electrode  | 10        | 10-80               | [3]       |
| L-cysteine/Lipoic Acid decorated Au NPs/SPCE | 3         | 3-25                | [4]       |
| AuNPs/rGO/SPCE                               | 26        | 1-100               | this work |

Co (DIP) bis(2-(4,5-diphenyl-1H-imidazol-2-yl)phenoxy)cobalt; GO graphene oxide; rGO reduced graphene oxide; Au NPs: gold nanoparticles; GCE glassy carbon electrode; CPE Carbon Paste Electrode.

## References

- Subramanian, S.; Elaiyappillai, E.; Asir, O.; Arulappan, D.; Palanisamy, S.; Princy, M. J.; Subramanian, R.; Samuel, V. J. *Electron. Mater.* **2019**, *48*, 4498–4506
- Srikant, S.; Kumar, S. P.; Kumar, S. A. *Electroanalysis* **2017**, *29*, 1400–1409
- Zhang, X.; Zeng, T.; Hu, C.; Hu, S.; Tian, Q. *Anal. Methods* **2016**, *8*, 1162–1169
- Jijana, A. N.; Mphuthi, N.; Shumbula, P.; Vilakazi, S.; Sikhivhilu, L. *Electrocatalysis* **2021**, *12*, 310–325
